# Supplementary figures and images for: Proline-Catalysed Amination Reactions in Cyclic Carbonate Solvents
Source: MDPI journal article supplement (doi:10.3390/molecules16043420), 2011-04-21

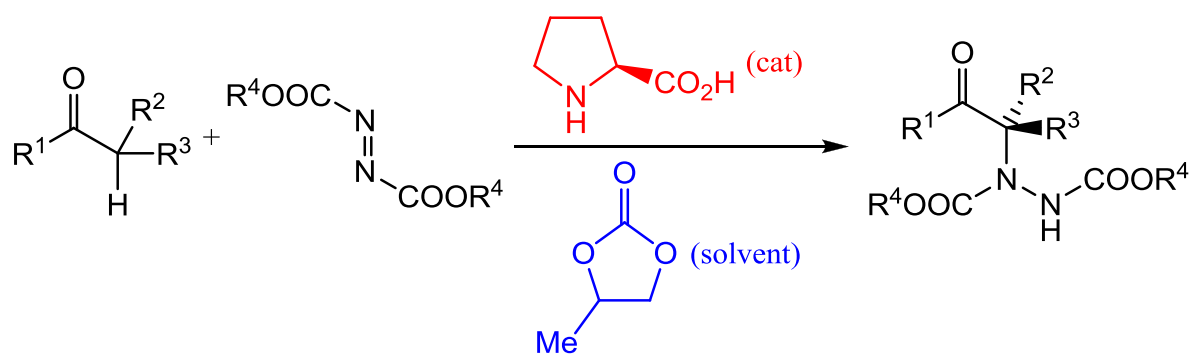

Supplement: s1 [file s1]
